# Supplementary material
Source: PubMed Central journal article supplement (PMC8316138)
Supplement: iai.00701-20-s0001.pdf [file iai.00701-20-s0001.pdf]

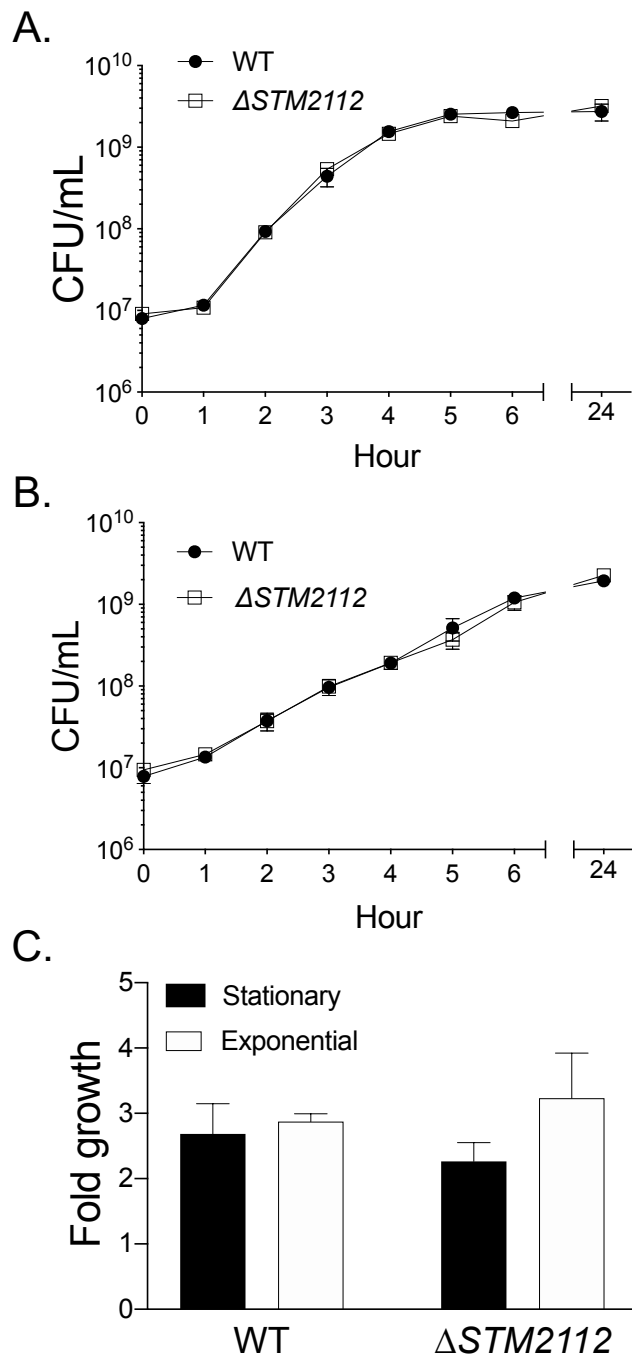

**Figure S1: The  $\Delta STM2112$  mutant has normal growth in rich, minimal, and neutrophil-*Salmonella* co-culture assay media.** Growth curves of the WT (HA420) and  $\Delta STM2112$  (JE971) mutant in (A) LB or (B) M9 minimal media. Overnight cultures were diluted 1:100 into indicated media. CFU/mL were determined hourly for 6 hours and at 24 hours on three independent occasions. Data points represent mean  $\pm$  SEM. (C) Bacteria from stationary and late-exponential growth were diluted in PBS to  $\sim 5 \times 10^6$  CFU and were added to 100  $\mu$ L RPMI-1640 with 10% normal human serum in 96-well plates. Cultures were incubated standing for 2 hours at 37°C with 5% CO<sub>2</sub>. CFU/mL was assessed at 0 and 2 hours to determine fold growth. Bars indicate mean  $\pm$  SEM performed on three independent occasions.

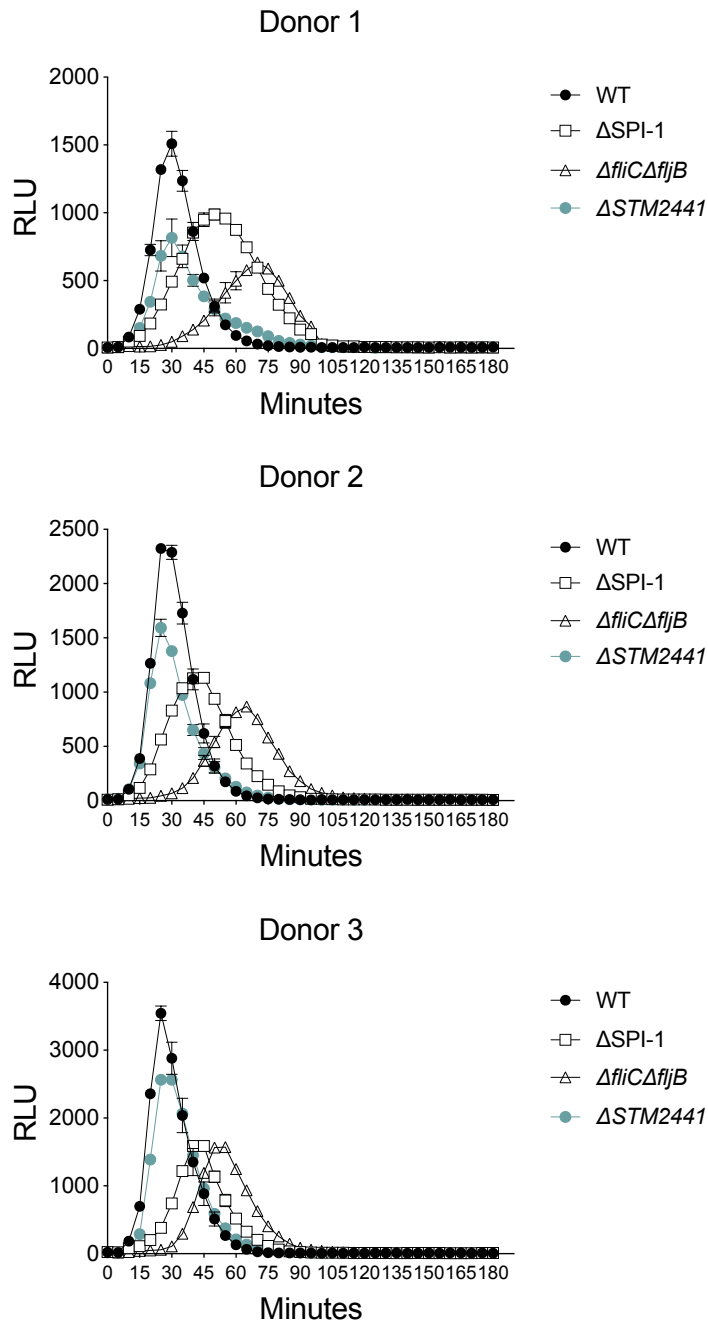

**Figure S2: Total neutrophil respiratory burst as assessed by luminol-enhanced chemiluminescence from individual donors.** Bacteria from late-exponential growth were exposed to neutrophils from 3 donors. Data from individual donors was used to calculate peak luminescence and time to peak luminescence for Figure 4.

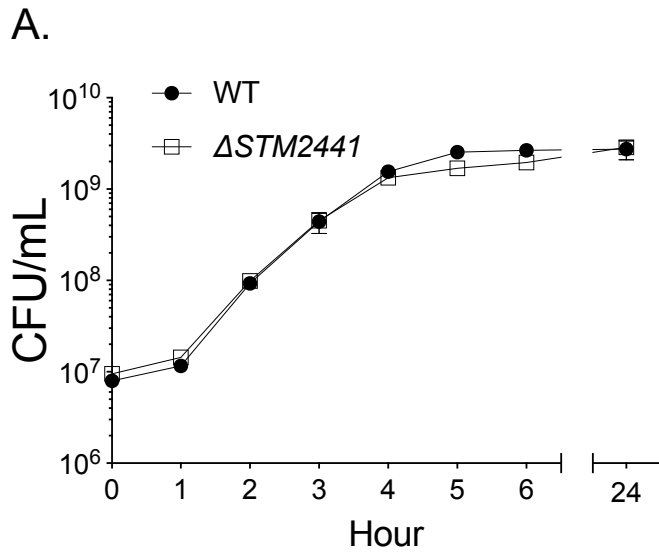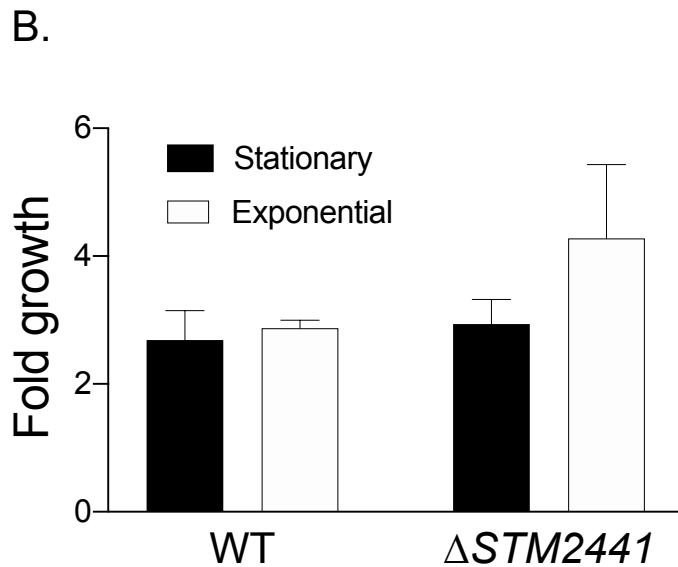

**Figure S3: The  $\Delta STM2441$  mutant has normal growth in rich and neutrophil-*Salmonella* co-culture media.** (A) Growth curve of the WT (HA420) and  $\Delta STM2441$  (JE975) in LB broth. (B) Growth of WT and the  $\Delta STM2441$  mutant in neutrophil assay media as in Figure S1. Bars indicate mean +/- SEM performed on three independent occasions.

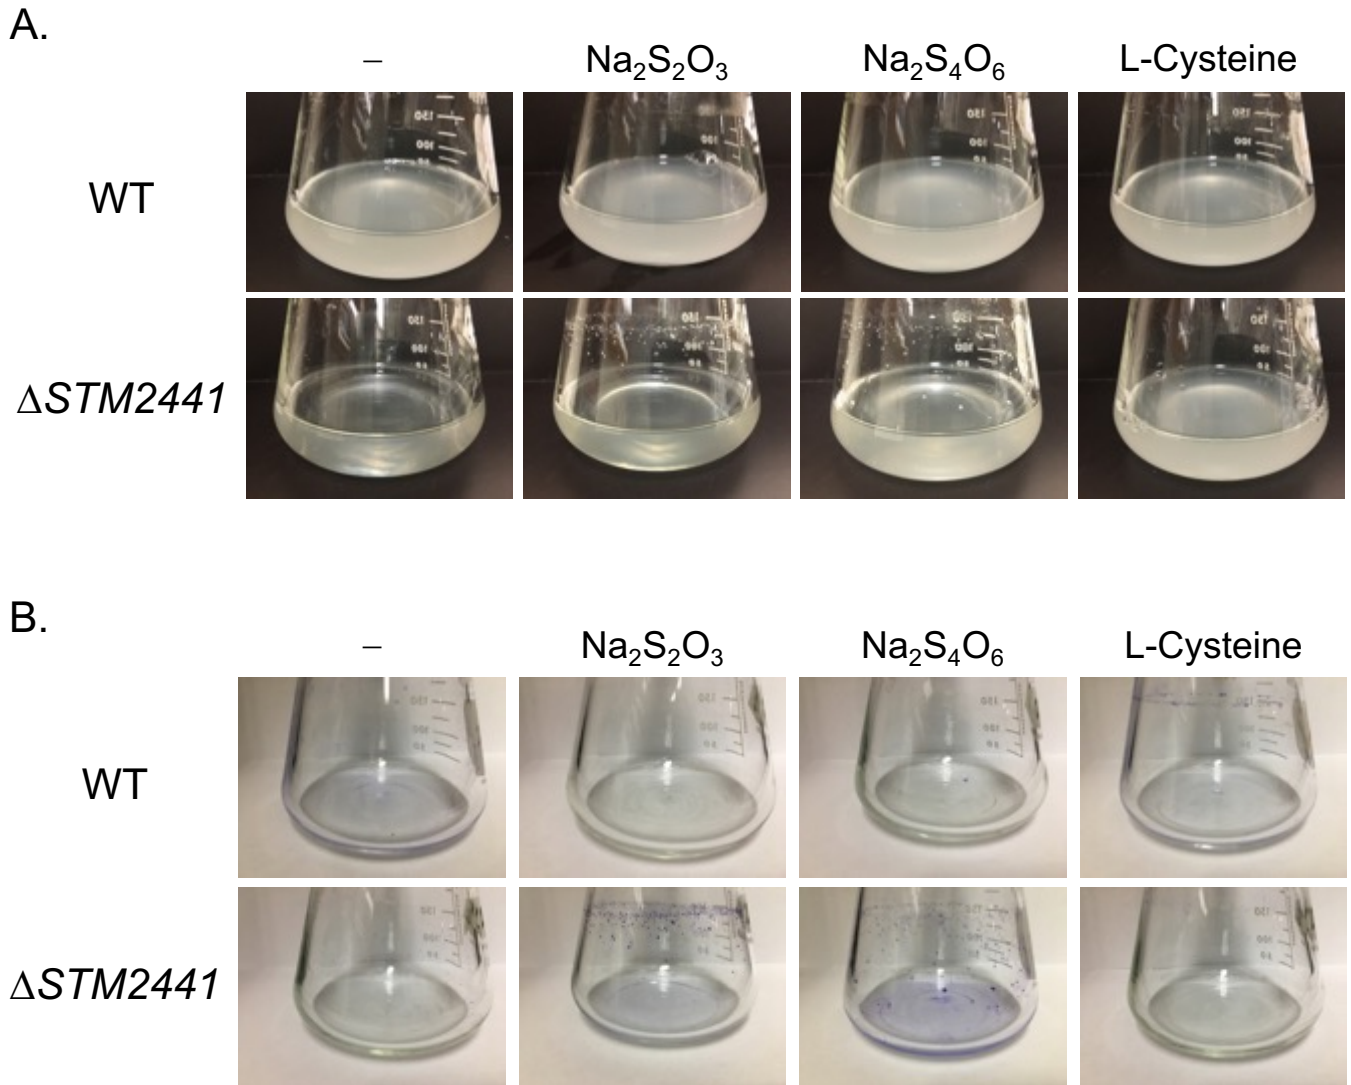

**Figure S4: Sulfur starvation induces aggregation and surface adherence of the  $\Delta\text{STM2441}$  mutant.** Bacterial aggregates (A) and surface-adherent aggregates stained with crystal violet (B) from the  $\Delta\text{STM2441}$  mutant grown in the indicated media. Images from bacteria prepared as for Figure 5C.

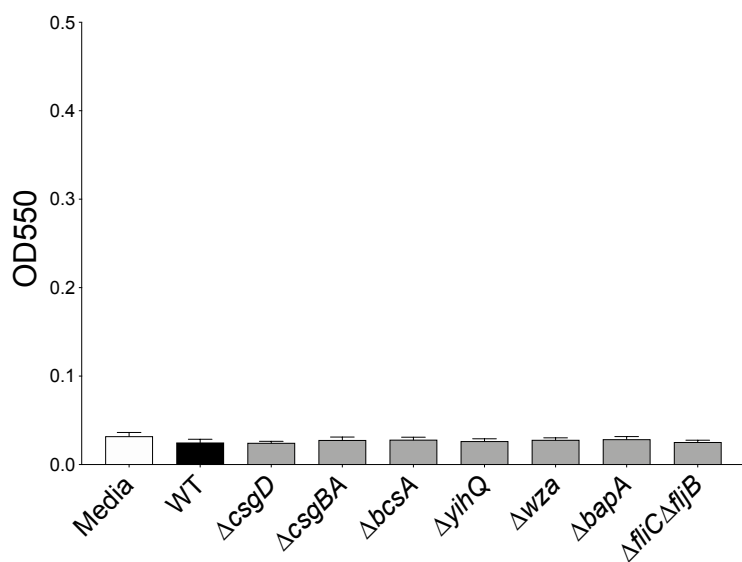

**Figure S5: Biofilm component single mutants do not adhere to surfaces.** The indicated mutants were grown as in Figure 6B and surface-adherent bacteria estimated by crystal-violet staining.
